# Supplementary material
Source: publisher figshare collection journal article supplement (https://acs.figshare.com/ndownloader/files/11917628)
Supplement: Supplementary file 1 [file 11917628]

**Supporting Information for:**

**Polychlorinated Aromatics Adsorption in EMT-  
Type Zeolite: a Combined Experimental-  
Simulation Approach**

*Joharimanitra Randrianandraina<sup>1,2,a</sup>, Irena Deroche<sup>1,2\*</sup>, Laetitia Bullot<sup>1</sup>, Régis  
Stephan<sup>1,2</sup>, Marie-Christine Hanf<sup>1,2</sup>, Gérald Chaplais<sup>1,2</sup>, T. Jean Daou<sup>1,2</sup>, Angélique  
Simon-Masseron<sup>1,2</sup>, Joël Patarin<sup>1,2</sup>, Philippe Sonnet<sup>1,2</sup>*

<sup>1</sup> Université de Haute-Alsace, CNRS, IS2M UMR 7361, F-68100 Mulhouse, France

<sup>2</sup> Université de Strasbourg, France

\* to whom correspondence should be addressed: [irena.deroche@uha.fr](mailto:irena.deroche@uha.fr)

## S1. EMT-type zeolite structure and its cationic distribution

EMC-2 zeolite, also known as hexagonal faujasite or Breck's structure Six, is a faujasite-like, large pore zeolite, first synthesized in pure phase by Delprato *et al.*<sup>1</sup>, using crown-ether based molecules as structure directing agents. Numerous synthetic zeolites (ZSM-3, ZSM-20<sup>2</sup>, CSZ-1, ECR-30) correspond to inter-grown materials where sheets of hexagonal (EMT) and cubic (FAU) structures are stacked in various manners<sup>3</sup>. Both, FAU and EMT frameworks are built on the basis of identical composite building units: double six rings (D6R, also called hexagonal prisms) and sodalite cages (also called  $\beta$  cage). Further, in both frameworks each sodalite cage is interconnected *via* a hexagonal prism to 4 other sodalite cages, creating a tetrahedral configuration. The difference between FAU and EMT topologies can be described on different levels. First, whereas in FAU structure the symmetry operation involved in the connection of the sodalite cages through the hexagonal prisms is an inversion center, in the EMT topology, for one of the four hexagonal prisms the connection occurs via a mirror plane<sup>4</sup>. Further, the planes formed by a honeycomb arrangement of sodalite cages interconnected through D6R are stacked in a hexagonal fashion in EMT, and in cubic way in FAU<sup>5</sup>. Finally, as a consequence of cubic stacking in the FAU-type zeolite there is a unique type of "supercage" (~13 Å of diameter), whereas a hexagonal stacking initiates two types of supercages in its structure: smaller ones, the as-called "hypocages", delimited through three twelve-membered rings (12-MR) and larger ones, designed as "hypercages", delimited by five 12-MR. The EMT framework with highlighted hypo- and hypercages is represented in Figure S1<sup>6</sup>.

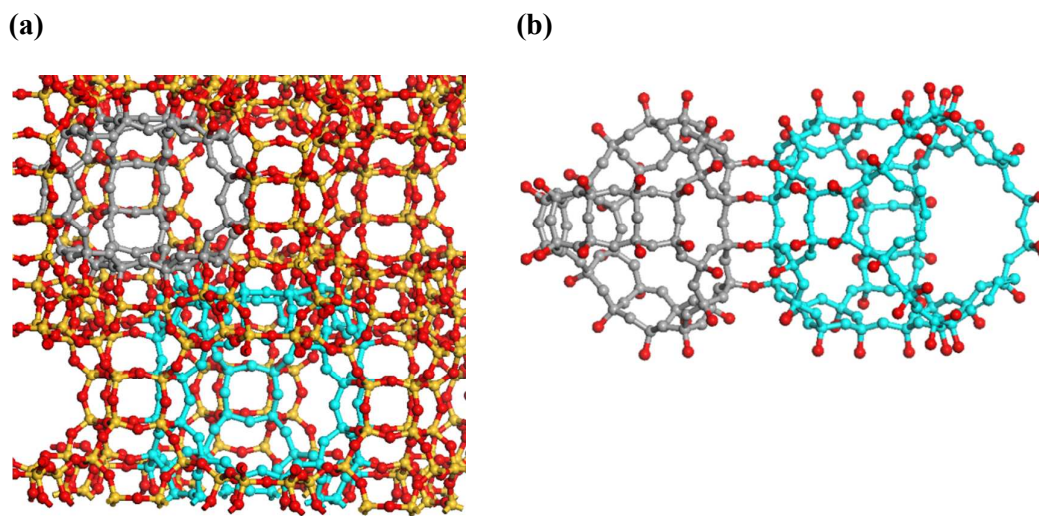

**Fig.S1.** (a) EMT-type zeolite framework with hypocage highlighted in silver and hypercage in cyan. (b) A detailed view on hypocage (in silver), connected to the hypercage (in cyan).

The EMT-type zeolite exists in the aluminosilicate form ( $\text{Si}:\text{Al} = 3.8$ ) with  $\text{Na}^+$  as charge compensating cations. The crystallographic sites hosting  $\text{Na}^+$  cations are labeled analogously to the Y Faujasite structure<sup>7</sup>: site I within the hexagonal prism, site I' inside the sodalite cage, in front of the hexagonal prism six-membered ring and site II close to the sodalite cage 6-membered ring inside the supercage. Note that no population of crystallographic sites III and III' has been observed, according to the relatively high Si/Al molar ratio of the EMC-2 zeolite framework. Indeed, sites III and III' are occupied only at high aluminum content corresponding to a Si/Al molar ratio lower than 1.5. In EMT-type zeolite, one additionally distinguishes two kinds of cationic sites: (1) situated within the part of the structure with the inversion center containing hexagonal prisms

(sites labeled “a”) and (2) situated within the part of the structure with the hexagonal prisms containing the mirror plane (sites labeled “b”). Thus, six different cationic crystallographic sites can be distinguished within the aluminosilicate EMC-2 zeolite with Si/Al molar ratio of 3.8: Ia, Ib, I’a, I’b, IIa and IIb.

## **S2. EMT-type zeolite synthesis**

### **S2.1 REACTANTS AND PROBE MOLECULES**

Sodium hydroxide (99.99 wt %, Riedel de Haën), colloidal silica (Ludox AS-40, Aldrich), sodium aluminate (57 wt %  $\text{Al}_2\text{O}_3$ , 40 wt %  $\text{Na}_2\text{O}$ , Strem Chemicals), 18-crown-6 (95 wt %, Alfa Aesar) and deionized water were chemical reagents. Anhydrous ortho- (*o*-DCIB) and meta-dichlorobenzenes (*m*-DCIB) were purchased from Sigma-Aldrich, and further used as received.

### **S2.2 MATERIALS SYNTHESIS**

For the EMC-2 zeolite synthesis, a gel with the following molar composition 2.1  $\text{Na}_2\text{O}$ : 10  $\text{SiO}_2$ : 1  $\text{Al}_2\text{O}_3$ : 0,5 18-crown-6: 100  $\text{H}_2\text{O}$  was placed in a PTFE-lined stainless steel autoclave and heated at 110 °C in static conditions for 19 days<sup>1</sup>. After the synthesis, the suspension is filtered and the precipitate is rinsed abundantly with distilled water 3 times, and dried at 70 °C. In order to remove the organic template occluded in the zeolite porosity, the as-synthesized sample is calcined under air during 4h at 550 °C with a heating rate of 1°. $\text{min}^{-1}$ .

### S3. Force field parameters

**Table S1.** Lennard-Jones parameters ( $\epsilon/k_B$ ,  $\sigma$ ) and partial atomic charges ( $q$ ) carried by adsorbate and adsorbent atoms. The scheme gives the denomination of adsorbate molecules constituting atoms. The parameters have been extracted from the Clay force field for zeolites<sup>8</sup> and from the TraPPE force field for adsorbates<sup>9</sup>. Green, black and white balls correspond to Cl, H and C atoms, respectively.

| Parameters for the non-bonded interactions |                    |              |        |
|--------------------------------------------|--------------------|--------------|--------|
| Atom                                       | $\epsilon/k_B$ (K) | $\sigma$ (Å) | $q(e)$ |
| C(1)(o-dichlorobenzene)                    | 30.70              | 3.60         | -0.11  |
| C(2)(o-dichlorobenzene)                    | 30.70              | 3.60         | -0.08  |
| C(3)(o-dichlorobenzene)                    | 30.70              | 3.60         | 0.08   |
| H(1)(o-dichlorobenzene)                    | 25.45              | 2.36         | 0.11   |
| H(2)(o-dichlorobenzene)                    | 25.45              | 2.36         | 0.10   |
| Cl(o-dichlorobenzene)                      | 149                | 3.42         | -0.1   |
| C(1)(m-dichlorobenzene)                    | 30.70              | 3.60         | -0.14  |
| C(2)(m-dichlorobenzene)                    | 30.70              | 3.60         | 0.00   |
| C(3)(m-dichlorobenzene)                    | 30.70              | 3.60         | 0.03   |
| C(4)(m-dichlorobenzene)                    | 30.70              | 3.60         | -0.05  |
| H(1)(m-dichlorobenzene)                    | 25.45              | 2.36         | 0.08   |
| H(2)(m-dichlorobenzene)                    | 25.45              | 2.36         | 0.12   |
| H(3)(m-dichlorobenzene)                    | 25.45              | 2.36         | 0.10   |

|                                     |         |      |       |
|-------------------------------------|---------|------|-------|
| <b>Cl(<i>m</i>-dichlorobenzene)</b> | 149     | 3.42 | -0.11 |
| <b>O (zeolite)</b>                  | 78.20   | 3.17 | -1.20 |
| <b>Si (zeolite)</b>                 | 0.93E-3 | 3.30 | 2.40  |
| <b>Al (zeolite)</b>                 | 0.93E-3 | 3.30 | 1.40  |
| <b>Na<sup>+</sup> (zeolite)</b>     | 65.47   | 2.35 | 1.00  |

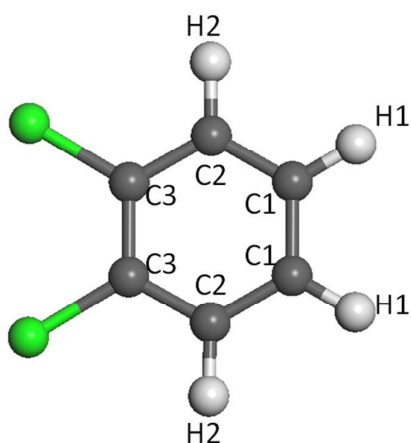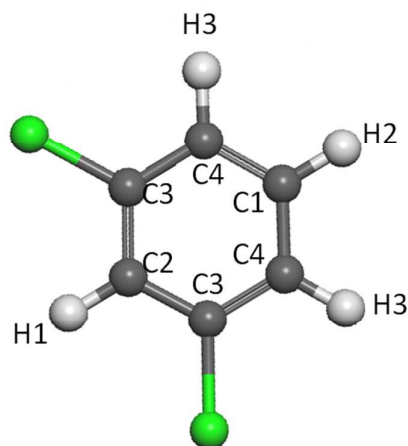

#### S4. Parameters of the zeolite structures optimized on the DFT level

**Table S2.** Comparison between the DFT fully relaxed simulated cell parameters of the EMT-type zeolite (P1 symmetry) in the purely siliceous (EMT (SiO<sub>2</sub>) and aluminosilicate (Na-EMT) forms in the absence (empty) and in the presence of the *o*- and *m*-DCIBs adsorbates.

| Structure | Empty               | EMT(SiO <sub>2</sub> ) | EMT(SiO <sub>2</sub> ) | Empty    | Na-EMT         | Na-EMT         |
|-----------|---------------------|------------------------|------------------------|----------|----------------|----------------|
|           | EMT                 | +                      | +                      | EMT      | +              | +              |
| Cell      | (SiO <sub>2</sub> ) | <i>o</i> -DCIB         | <i>m</i> -DCIB         | (Na-EMT) | <i>o</i> -DCIB | <i>m</i> -DCIB |

| parameters            |          |          |          |         |         |         |
|-----------------------|----------|----------|----------|---------|---------|---------|
| $a$ (Å)               | 17.081   | 16.996   | 16.996   | 16.975  | 16.937  | 16.941  |
| $b$ (Å)               | 17.081   | 16.996   | 16.997   | 16.996  | 16.935  | 16.942  |
| $c$ (Å)               | 27.689   | 27.403   | 27.412   | 27.998  | 27.967  | 27.9615 |
| $\alpha$ (°)          | 90.002   | 89.942   | 90.011   | 90.03   | 90.102  | 90.133  |
| $\beta$ (°)           | 90.007   | 90.073   | 89.992   | 90.37   | 90.174  | 90.201  |
| $\gamma$ (°)          | 120.038  | 120.053  | 120.072  | 120.59  | 120.440 | 120.444 |
| $V$ (Å <sup>3</sup> ) | 6993.350 | 6851.488 | 6852.975 | 6953.39 | 6915.68 | 6918.77 |

### S5. Adsorption energies extracted from the DFT calculation

**Table S3.** Adsorption Energies (given in kJ/mol) obtained by the DFT-D2 calculations for the *o*- and *m*-DCIBs adsorbed within purely siliceous ((EMT(SiO<sub>2</sub>)) and aluminosilicate (Na-EMT) EMT-type materials

| DCIB                    |        |        |
|-------------------------|--------|--------|
|                         | Ortho- | Meta-  |
| Zeolite                 |        |        |
| EMT (SiO <sub>2</sub> ) | -66.2  | -68.6  |
| Na-EMT                  | -132.8 | -122.1 |

## References

- [1] Delprato, F.; Delmotte, L.; Guth, J.L.; Huve, L. Synthesis of New Silica-Rich Cubic and Hexagonal Faujasites Using Crown-Ether-Based Supramolecules as Templates. *Zeolites* **1990**, *10*, 546-552.
- [2] Derouane, E.G.; Dewaele, N.; Gabelica, Z.; Nagy, J.B. Physicochemical Characterisation of Zeolite ZSM-20. *Applied Catalysis* **1986**, *28*, 285-293.
- [3] Anderson, M.W.; Pachis, K.S.; Prebin, F.; Carr, S.W.; Terasaki, O.; Ohsuna, T.; Alfreddson, V. Intergrowths of Cubic and Hexagonal Polytypes of Faujasite Zeolite. *J. Chem. Soc., Chem. Commun.* **1991**, 1660-1664.
- [4] Thomas, J.M.; Ramdas, S.; Millward, G.R.; Klinowski, J.; Audier, M.; Gonzales-Calbet, J.; Fyfe, C.A. Surprises in the Structural Chemistry of Zeolites. *J. Solid State Chem.* **1982**, *45*, 368-380.
- [5] Dognier, F.; Patarin, J.; Guth, J.L.; Anglerot, D. Synthesis, Characterisation, and Catalytic Properties of Silica-Rich Faujasite-Type Zeolite (FAU) and its Hexagonal Analog (EMT) Prepared by Using Crown-Ethers as Templates. *Zeolites* **1992**, *12*, 161-166.
- [6] Newsam, J.M.; Treacy, M.M.; Vaughan, D.E.W.; Strohmaier, K.G.; Mortier, W.J. The Structure of Zeolite ZSM-20: Mixed Cubic and Hexagonal Stackings of Faujasite Sheets. *J. Chem. Soc., Chem. Commun.* **1989**, 493-495.
- [7] Lievens, J.L.; Verduijn, J.P. ; Bons, A.-J. ; Mortier, W.J. Cation Site Energies in Dehydrated Hexagonal Faujasite (EMT). *Zeolites* **1992**, *12*, 698-705.
- [8] Cygan, R. T; Liang, J.-J. ; Kalinichev, A. G. Molecular Models of Hydroxide, Oxyhydroxide, and Clay Phases and the Development of a General Force Field. *J. Phys. Chem. B* **2004**, *108*, 1255–1266.
- [9] Rai, N.; Siepmann, J.I. Transferable Potentials for Phase Equilibria. 10. Explicit-Hydrogen Description of Substituted Benzenes and Polycyclic Aromatic Compounds. *J. Phys. Chem. B* **2013**, *117*, 273–288.
